# Supplementary material
Source: ML conference proceedings conference paper supplement (https://proceedings.mlr.press/v54/anand17a.html)
Supplement: Supplementary file [file anand17a-supp.pdf]

# Supplementary Material for "Non-Count Symmetries in Boolean & Multi-Valued Prob. Graphical Models"

## 1. Proof of Theorem 5.1:

Let the transition probability from  $s_t$  to  $s_{t+1}$  in NEC-Orbital MCMC be given by  $T^{NEC}(s_t \rightarrow s_{t+1})$ . And, let  $T_2(s'_t \rightarrow s_{t+1})$  denote the transition probability because of the last 2 steps given in Section-5. Then, we can write  $T^{NEC}$  as:

$$T^{NEC}(s_t \rightarrow s_{t+1}) = \sum_{s'_t \in \Gamma_{\Phi}(s_{t+1})} T^M(s_t \rightarrow s'_t) \cdot T_2(s'_t \rightarrow s_{t+1})$$

where  $\Gamma_{\Phi}(s_{t+1})$  denotes the orbit of  $s_{t+1}$  with respect to the original domain

Obeying the notation in Section 5,  $u'_t = rep(s'_t)$  and  $u''_t = rep(s_{t+1})$ . Also, since the last step (given in Section 5) is equivalent to sampling  $s_{t+1}$  uniformly at random from the sub-orbit  $u''_t$ , and, if we represent  $T^{MH}$  as transition probability for the second step, we get:

$$\begin{aligned} T_2(s'_t \rightarrow s_{t+1}) &= T^{MH}(u'_t \rightarrow u''_t) \cdot P(s_{t+1}|u''_t) \\ &= T^{MH}(u'_t \rightarrow u''_t) \cdot \frac{1}{c(u''_t)} \end{aligned}$$

Therefore, we get:

$$T_2(s'_t \rightarrow s_{t+1}) = \begin{cases} \left( \frac{1}{|\Gamma_{\Phi R}(u'_t)|} \cdot A(u'_t \rightarrow u''_t) \right) \cdot \frac{1}{c(u''_t)}, & \text{if } u'_t \neq u''_t \\ \left( \frac{1}{|\Gamma_{\Phi R}(u'_t)|} + \sum_{z \in \Gamma_{\Phi R}(u'_t)} \frac{1}{|\Gamma_{\Phi R}(u'_t)|} \cdot (1 - A(u'_t \rightarrow z)) \right) \cdot \frac{1}{c(u''_t)}, & \text{if } u'_t = u''_t \end{cases}$$

**Lemma:**  $\forall s_1 \forall s_2$  such that  $u_1 = rep(s_1)$ ,  $u_2 = rep(s_2)$  and  $\Gamma_{\Phi R}(u_1) = \Gamma_{\Phi R}(u_2)$ , we have:

$$T_2(s_1 \rightarrow s_2) = T_2(s_2 \rightarrow s_1)$$

This lemma basically shows that  $T_2$  obeys detailed balance with respect to the uniform distribution over states in the (original) orbit of  $s_1$  and  $s_2$ .

**Proof of Lemma:**

**Case 1:**  $u_1 \neq u_2$

$$\begin{aligned} T_2(s_1 \rightarrow s_2) &= \left( \frac{1}{|\Gamma_{\Phi R}(u_1)|} \cdot A(u_1 \rightarrow u_2) \right) \cdot \frac{1}{c(u_2)} \\ &= \frac{1}{|\Gamma_{\Phi R}(u_1)|} \cdot \min \left( 1, \frac{c(u_2)}{c(u_1)} \right) \cdot \frac{1}{c(u_2)} = \frac{1}{|\Gamma_{\Phi R}(u_1)|} \cdot \min \left( \frac{1}{c(u_2)}, \frac{1}{c(u_1)} \right) \\ &= \frac{1}{|\Gamma_{\Phi R}(u_1)|} \cdot \min \left( \frac{c(u_1)}{c(u_2)}, 1 \right) \cdot \frac{1}{c(u_1)} \\ &= \left( \frac{1}{|\Gamma_{\Phi R}(u_1)|} \cdot A(u_2 \rightarrow u_1) \right) \cdot \frac{1}{c(u_1)} \\ &= T_2(s_2 \rightarrow s_1) \end{aligned}$$

**Case 2:**  $u_1 = u_2$

It trivially holds for this case because the expression of  $T_2$  doesn't depend on the states  $s_1$

and  $s_2$  but just their sub-orbit (which is the same in this case).

Now, let  $\pi$  denote the unique stationary distribution of the Markov Chain  $\mathcal{M}$ . We show that  $T^{NEC}$  also has  $\pi$  as its stationary distribution, i.e. for any state  $s \in \mathcal{S}$ , we show that:

$$\pi(s) = \sum_{s_0 \in \mathcal{S}} \pi(s_0) \cdot T^{NEC}(s_0 \rightarrow s)$$

**Proof:**

$$\begin{aligned}
RHS &= \sum_{s_0 \in \mathcal{S}} \pi(s_0) \cdot T^{NEC}(s_0 \rightarrow s) \\
&= \sum_{s_0 \in \mathcal{S}} \pi(s_0) \cdot \left[ \sum_{s'_0 \in \Gamma_{\Phi}(s)} T^M(s_0 \rightarrow s'_0) \cdot T_2(s'_0 \rightarrow s) \right] \\
&= \sum_{s_0 \in \mathcal{S}} \sum_{s'_0 \in \Gamma_{\Phi}(s)} \pi(s_0) \cdot T^M(s_0 \rightarrow s'_0) \cdot T_2(s'_0 \rightarrow s) \\
&= \sum_{s_0 \in \mathcal{S}} \sum_{s'_0 \in \Gamma_{\Phi}(s)} \pi(s'_0) \cdot T^M(s'_0 \rightarrow s_0) \cdot T_2(s'_0 \rightarrow s); \text{ because of detailed balance of } T^M \\
&= \sum_{s_0 \in \mathcal{S}} \sum_{s'_0 \in \Gamma_{\Phi}(s)} \pi(s) \cdot T^M(s'_0 \rightarrow s_0) \cdot T_2(s'_0 \rightarrow s); \text{ because } s'_0 \text{ and } s \text{ are in same orbit} \\
&= \pi(s) \cdot \sum_{s_0 \in \mathcal{S}} \sum_{s'_0 \in \Gamma_{\Phi}(s)} T^M(s'_0 \rightarrow s_0) \cdot T_2(s'_0 \rightarrow s) \\
&= \pi(s) \cdot \sum_{s'_0 \in \Gamma_{\Phi}(s)} \left[ \sum_{s_0 \in \mathcal{S}} T^M(s'_0 \rightarrow s_0) \right] \cdot T_2(s'_0 \rightarrow s) \\
&= \pi(s) \cdot \sum_{s'_0 \in \Gamma_{\Phi}(s)} T_2(s'_0 \rightarrow s) \\
&= \pi(s) \cdot \sum_{s'_0 \in \Gamma_{\Phi}(s)} T_2(s \rightarrow s'_0); \text{ because of the lemma} \\
&= \pi(s) \cdot 1 \\
&= LHS
\end{aligned}$$

Hence, proved.
